# Supplementary material for: Predicting stroke and death in patients with heart failure using CHA2DS2-VASc score in Asia
Source: PubMed Central journal article supplement (PMC6688312; doi:10.1186/s12872-019-1178-0), 2019-08-08
Supplement: 12872_2019_1178_MOESM2_ESM.pdf [file 12872_2019_1178_MOESM2_ESM.pdf]

**Additional file 2.** Assessment of CHA<sub>2</sub>DS<sub>2</sub>-VASc score for predicting of stroke and death at end point in the KorAHF study population, stratified according to prior diagnosis of atrial fibrillation

| Characteristics               | Overall (n=5,158)   |         | With AF (n=2,091)   |         | Without AF (n=3,067) |         |
|-------------------------------|---------------------|---------|---------------------|---------|----------------------|---------|
|                               | HR (95% CI)         | P-value | HR (95% CI)         | P-value | HR (95% CI)          | P-value |
| <b>Stroke</b>                 |                     |         |                     |         |                      |         |
| Model 1                       | 1.227 (1.150-1.308) | <0.001  | 1.238 (1.133-1.353) | <0.001  | 1.210 (1.102-1.329)  | <0.001  |
| Model 2                       | 1.259 (1.171-1.354) | <0.001  | 1.279 (1.160-1.410) | <0.001  | 1.190 (1.062-1.334)  | 0.003   |
| Model 3                       | 1.203 (1.118-1.290) | <0.001  | 1.220 (1.105-1.350) | <0.001  | 1.149 (1.026-1.290)  | 0.016   |
| C-index (95% CI) <sup>a</sup> | 0.587 (0.553-0.622) |         | 0.589 (0.540-0.637) |         | 0.584 (0.536-0.633)  |         |
| <b>Death</b>                  |                     |         |                     |         |                      |         |
| Model 1                       | 1.245 (1.216-1.275) | <0.001  | 1.220 (1.174-1.267) | <0.001  | 1.262 (1.223-1.302)  | <0.001  |
| Model 2                       | 1.234 (1.200-1.269) | <0.001  | 1.211 (1.160-1.263) | <0.001  | 1.245 (1.199-1.292)  | <0.001  |
| C-index (95% CI) <sup>a</sup> | 0.645 (0.629-0.660) |         | 0.626 (0.602-0.650) |         | 0.657 (0.637-0.676)  |         |

Abbreviations: HR, hazard ratio; CI, confidence interval

Model 1: unadjusted model

Model 2: adjusted for previous chronic renal failure, ischemic heart disease, valvular heart disease, cardiomyopathy, COPD, medications and smoking.

Model 3: competing risk model adjusted for previous chronic renal failure, ischemic heart disease, valvular heart disease, cardiomyopathy, chronic obstructive pulmonary disease (COPD), medications, and smoking after considering all-cause death as a competing risk.

<sup>a</sup>Obtained using ROC curve analysis by non-parametric method
