# Supplementary material for: Predicting stroke and death in patients with heart failure using CHA2DS2-VASc score in Asia
Source: Springer Nature journal article supplement (doi:10.1186/s12872-019-1178-0), 2019-08-08
Supplement: MOESM1 [file 17050436]

**Additional file 1.** Incidence rates of stroke and death at end point in KorAHF study population, stratified according to prior diagnosis of atrial fibrillation

| Characteristics                                 | Overall<br>(n=5,158) |       | With AF<br>(n=2,091) |       | Without AF<br>(n=3,067) |       |
|-------------------------------------------------|----------------------|-------|----------------------|-------|-------------------------|-------|
|                                                 | Cases (%)            | IR    | Cases (%)            | IR    | Cases (%)               | IR    |
| <b>Stroke</b>                                   | 272 (5.3)            | 2.30  | 147 (7.0)            | 3.13  | 125 (4.1)               | 1.75  |
| <b>Age, years</b>                               |                      |       |                      |       |                         |       |
| < 40                                            | 3 (1.1)              | 0.40  | 1 (2.2)              | 0.88  | 2 (0.9)                 | 0.32  |
| 40-49                                           | 12 (3.5)             | 1.30  | 2 (2.0)              | 0.75  | 10 (4.1)                | 1.53  |
| 50-59                                           | 29 (4.5)             | 1.65  | 15 (6.4)             | 2.37  | 14 (3.5)                | 1.25  |
| 60-69                                           | 52 (5.2)             | 2.03  | 25 (6.3)             | 2.38  | 27 (4.5)                | 1.79  |
| 70-79                                           | 113 (6.5)            | 2.94  | 64 (8.0)             | 3.62  | 49 (5.2)                | 2.36  |
| ≥ 80                                            | 63 (5.4)             | 3.13  | 40 (7.8)             | 4.63  | 23 (3.5)                | 2.00  |
| <b>Sex</b>                                      |                      |       |                      |       |                         |       |
| Male                                            | 140 (5.1)            | 2.19  | 64 (6.0)             | 2.61  | 76 (4.5)                | 1.93  |
| Female                                          | 132 (5.5)            | 2.43  | 83 (8.1)             | 3.70  | 49 (3.5)                | 1.53  |
| <b>CHA<sub>2</sub>DS<sub>2</sub>-VASc score</b> |                      |       |                      |       |                         |       |
| 1 (HF only)                                     | 14 (4.0)             | 1.42  | 7 (5.1)              | 1.85  | 7 (3.3)                 | 1.16  |
| 2                                               | 19 (2.4)             | 0.89  | 12 (4.3)             | 1.58  | 7 (1.4)                 | 0.51  |
| 3                                               | 37 (4.5)             | 1.72  | 18 (5.3)             | 2.02  | 19 (3.9)                | 1.51  |
| 4                                               | 54 (5.6)             | 2.50  | 30 (7.2)             | 3.35  | 24 (4.4)                | 1.90  |
| 5                                               | 56 (5.6)             | 2.66  | 28 (6.7)             | 3.25  | 28 (4.8)                | 2.26  |
| 6                                               | 49 (7.0)             | 3.63  | 26 (9.4)             | 5.14  | 23 (5.4)                | 2.73  |
| ≥7                                              | 43 (8.0)             | 4.42  | 26 (11.8)            | 6.38  | 17 (5.4)                | 3.01  |
| <b>Death</b>                                    | 1950 (37.8)          | 15.92 | 809 (38.7)           | 16.43 | 1141 (37.2)             | 15.58 |
| <b>Age, years</b>                               |                      |       |                      |       |                         |       |
| < 40                                            | 32 (11.8)            | 4.22  | 8 (17.4)             | 6.80  | 24 (10.7)               | 3.75  |
| 40-49                                           | 61 (17.9)            | 6.41  | 18 (18.2)            | 6.59  | 43 (17.8)               | 6.34  |
| 50-59                                           | 136 (21.3)           | 7.55  | 50 (21.2)            | 7.64  | 86 (21.4)               | 7.50  |
| 60-69                                           | 313 (31.2)           | 11.81 | 115 (28.8)           | 10.55 | 198 (32.8)              | 12.70 |
| 70-79                                           | 725 (41.6)           | 18.08 | 326 (40.8)           | 17.37 | 399 (42.2)              | 18.71 |
| ≥ 80                                            | 683 (58.8)           | 32.84 | 292 (57.0)           | 32.03 | 391 (60.2)              | 33.48 |
| <b>Sex</b>                                      |                      |       |                      |       |                         |       |
| Male                                            | 1036 (37.8)          | 15.61 | 417 (39.1)           | 16.32 | 619 (36.9)              | 15.16 |
| Female                                          | 914 (37.8)           | 16.29 | 392 (38.2)           | 16.55 | 522 (37.5)              | 16.09 |
| <b>CHA<sub>2</sub>DS<sub>2</sub>-VASc score</b> |                      |       |                      |       |                         |       |
| 1 (HF only)                                     | 58 (16.6)            | 5.70  | 23 (16.7)            | 5.87  | 35 (16.6)               | 5.59  |
| 2                                               | 160 (20.4)           | 7.39  | 58 (20.8)            | 7.42  | 102 (20.2)              | 7.38  |
| 3                                               | 243 (29.3)           | 10.99 | 108 (31.7)           | 11.86 | 135 (27.7)              | 10.39 |
| 4                                               | 407 (42.5)           | 18.11 | 193 (46.4)           | 20.30 | 214 (39.6)              | 16.50 |
| 5                                               | 439 (43.9)           | 20.10 | 174 (41.4)           | 19.15 | 265 (45.6)              | 20.79 |
| 6                                               | 341 (48.6)           | 24.32 | 138 (49.8)           | 25.70 | 203 (47.9)              | 23.46 |
| ≥7                                              | 302 (56.2)           | 29.47 | 115 (52.3)           | 25.91 | 187 (59.0)              | 32.19 |

Abbreviations: IR, incidence rate  
Incidence rates per 100 person-years
