# Supplementary material for: Predicting stroke and death in patients with heart failure using CHA2DS2-VASc score in Asia
Source: Springer Nature journal article supplement (doi:10.1186/s12872-019-1178-0), 2019-08-08
Supplement: MOESM3 [file 17050436]

**Additional file 3.** Frequency of cardiomyopathy according to the CHA<sub>2</sub>DS<sub>2</sub>-VASc score at baseline

| CHA <sub>2</sub> DS <sub>2</sub> -VASc score | Cardiomyopathy |             |
|----------------------------------------------|----------------|-------------|
|                                              | Yes (n=1409)   | No (n=3749) |
| 1                                            | 178(51.0)      | 171(49.0)   |
| 2                                            | 312(39.8)      | 472(60.2)   |
| 3                                            | 272(32.8)      | 557(67.2)   |
| 4                                            | 250(26.1)      | 707(73.9)   |
| 5                                            | 209(20.9)      | 792(79.1)   |
| 6                                            | 118(16.8)      | 583(83.2)   |
| ≥7                                           | 70(13.0)       | 467(87.0)   |

Data reported as n (%)
